# Supplementary material
Source: PubMed Central journal article supplement (PMC8856012)
Supplement: NIHMS1777586-supplement-1.pdf [file NIHMS1777586-supplement-1.pdf]

**Supplementary Table 1.** Baseline demographic characteristics of UK Biobank and NHS/HPFS participants by sex.

| Characteristic                                                 | UK Biobank (Women)      |                        | UK Biobank (Men)        |                        | NHS (Women)            |                        | HPFS (Men)             |                        |
|----------------------------------------------------------------|-------------------------|------------------------|-------------------------|------------------------|------------------------|------------------------|------------------------|------------------------|
|                                                                | Full Cohort (n=217,146) | Glioma Cases (n=188)   | Full Cohort (n=188,117) | Glioma Cases (n=302)   | Cases (n=52)           | Controls (n=104)       | Cases (n=32)           | Controls (n=64)        |
| Age (median, IQR)                                              | 57<br>(49-62)           | 61<br>(56-64)          | 57<br>(49-63)           | 61<br>(56-65)          | 59<br>(53-63)          | 59<br>(53-63)          | 64<br>(56-72)          | 64<br>(56-72)          |
| Year of blood collection                                       | 2006-2010               |                        |                         |                        | 1989-1990              |                        | 1993-1995              |                        |
| Time from blood collection to glioma diagnosis (median, range) |                         | 3.9<br>(0.1-9.0)       |                         | 3.8<br>(0.02-8.5)      | 9.3 (1.1-16.7)         |                        | 6.3 (0.3-20.6)         |                        |
| BMI (median, IQR)                                              | 26.1<br>(23.4-29.7)     | 26.4<br>(23.8-29.5)    | 27.3<br>(25.0-30.1)     | 26.9<br>(24.7-30.1)    | 23.6<br>(21.0-27.2)    | 25.7<br>(22.6-29.2)    | 25.0<br>(23.5-27.0)    | 25.2<br>(22.8-27.4)    |
| Race (n, %)*                                                   |                         |                        |                         |                        |                        |                        |                        |                        |
| White                                                          | 203,584 (93.8)          | 185 (98.4)             | 176,084 (93.6)          | 291 (96.4)             | 8 (15.4)               | 93 (89.4)              | 30 (93.8)              | 60 (93.8)              |
| Non-white                                                      | 12,930 (6.0)            | 2 (1.1)                | 11,232 (6.0)            | 6 (2.0)                | 0                      | 0                      | 2 (6.3)                | 0                      |
| Missing                                                        | 632 (0.3)               | 1 (0.5)                | 801 (0.1)               | 5 (1.7)                | 44 (84.6)              | 11 (10.6)              | 0                      | 4 (6.3)                |
| Education (n, %)^                                              |                         |                        |                         |                        |                        |                        |                        |                        |
| Secondary school                                               | 62,142 (28.6)           | 50 (26.6)              | 45,987 (24.4)           | 60 (19.9)              | 0                      | 0                      | 0                      | 0                      |
| Vocational training                                            | 12,230 (5.6)            | 10 (5.3)               | 8,000 (4.3)             | 12 (4.0)               | 0                      | 0                      | 0                      | 0                      |
| Some college                                                   | 35,567 (16.4)           | 25 (13.3)              | 36,256 (19.3)           | 53 (17.5)              | 52 (100)               | 104 (100)              | 32 (100)               | 64 (100)               |
| Completed college                                              | 68,588 (31.6)           | 66 (35.1)              | 64,183 (34.1)           | 98 (32.5)              | 0                      | 0                      | 0                      | 0                      |
| None of the above                                              | 34,866 (16.1)           | 32 (17.0)              | 30,301 (16.1)           | 69 (22.8)              | 0                      | 0                      | 0                      | 0                      |
| Missing                                                        | 3,783 (1.7)             | 5 (2.7)                | 3,390 (1.8)             | 10 (3.3)               | 0                      | 0                      | 0                      | 0                      |
| TC (median, IQR)                                               | 224.2<br>(196.3-253.9)  | 229.2<br>(199.9-256.5) | 211.7<br>(183.1-241.0)  | 214.0<br>(178.6-241.8) | 198.7<br>(173.4-220.4) | 195.3<br>(181.4-219.5) | 186.2<br>(168.0-210.6) | 196.4<br>(164.6-220.5) |
| HDL-C (median, IQR)                                            | 60.1<br>(51.2-70.3)     | 58.4<br>(51.1-67.3)    | 47.8<br>(41.1-56.0)     | 49.3<br>(43.0-58.9)    | 55.4<br>(46.3-63.0)    | 56.2<br>(47.5-65.3)    | 41.8<br>(35.8-47.1)    | 40.6<br>(36.1-51.1)    |
| LDL-C (median, IQR)                                            | 137.5<br>(116.0-161.0)  | 142.5<br>(122.5-164.9) | 134.4<br>(111.9-157.0)  | 133.6<br>(110.2-155.9) | 128.3<br>(96.5-144.9)  | 118.1<br>(96.4-139.9)  | 119.9<br>(109.4-138.0) | 128.9<br>(102.0-149.3) |
| TG (median, IQR)                                               | 116.6<br>(84.3-165.8)   | 126.1<br>(94.1-177.1)  | 149.9<br>(104.2-217.4)  | 144.3<br>(101.4-214.5) | 87.6<br>(63.9-137.2)   | 91.5<br>(74.4-120.8)   | 108.7<br>(78.6-153.7)  | 109.8<br>(67.9-148.8)  |
| History of hypertension (n, %)                                 |                         |                        |                         |                        |                        |                        |                        |                        |
| Yes                                                            | 50781 (23.4)            | 46 (24.5)              | 54866 (29.2)            | 105 (34.8)             | 14 (26.9)              | 24 (23.1)              | 8 (25.0)               | 11 (17.2)              |
| No                                                             | 165936 (76.4)           | 141 (0.75)             | 132876 (70.6)           | 195 (64.6)             | 38 (73.1)              | 80 (76.9)              | 24 (75.0)              | 53 (82.8)              |
| Missing                                                        | 429 (0.2)               | 1 (0.5)                | 375 (0.2)               | 2 (0.7)                | 0                      | 0                      | 0                      | 0                      |
| History of diabetes (n, %)                                     |                         |                        |                         |                        |                        |                        |                        |                        |
| Yes                                                            | 7909 (3.6)              | 5 (2.7)                | 12669 (6.7)             | 23 (7.6)               | 2 (3.9)                | 2 (1.9)                | 0                      | 4 (6.3)                |
| No                                                             | 208809 (96.2)           | 183 (97.3)             | 174884 (93.0)           | 277 (91.7)             | 50 (96.2)              | 102 (98.1)             | 32 (100.0)             | 60 (93.8)              |
| Missing                                                        | 428 (0.2)               | 0                      | 564 (0.3)               | 2 (0.7)                | 0                      | 0                      | 0                      | 0                      |
| Statin use (n, %) <sup>†</sup>                                 |                         |                        |                         |                        |                        |                        |                        |                        |
| Current statin use                                             | 22994 (10.6)            | 28 (14.9)              | 36713 (19.5)            | 73 (24.2)              | -                      | -                      | 3 (9.4)                | 4 (6.3)                |
| No current statin use                                          | 193973 (89.3)           | 160 (85.1)             | 151198 (80.4)           | 229 (75.9)             | -                      | -                      | 29 (90.6)              | 60 (93.8)              |
| Missing                                                        | 179 (0.1)               | 0                      | 206 (0.1)               | 0                      | -                      | -                      | 0                      | 0                      |

Abbreviations: NHS: Nurses' Health Study, HPFS: Health Professionals Follow-Up Study, BMI: body mass index, HDL: high-density lipoprotein, IQR: interquartile range, LDL: low-density lipoprotein, TG: triglycerides

\*Race was not assessed in NHS until the 2004 questionnaire, and is presented here for all participants who survived to complete the 2004 questionnaire.

^Although not assessed explicitly in NHS and HPFS, all participants in the cohorts had at least some college education, and are indicated as such in the table.

†Variable was not assessed in the NHS.

**Supplementary Table 2.** Risk of glioma in the UK Biobank and Nurses' Health Study/Health Professionals Follow-Up Study by baseline cholesterol concentrations by sex.

|       | Quartile | Range (mg/dL)* | UK Biobank (Women, n=188) |        |           | UK Biobank (Men, n=302) |        |           | NHS (Women, n=52) |          |           | HPFS (Men, n=32) |          |           |
|-------|----------|----------------|---------------------------|--------|-----------|-------------------------|--------|-----------|-------------------|----------|-----------|------------------|----------|-----------|
|       |          |                | Cases^                    | MV HR^ | 95%CI     | Cases^                  | MV HR† | 95%CI     | Cases             | MV OR‡** | 95%CI     | Cases            | MV OR**% | 95%CI     |
| TC    | Q1       | <190           | 27                        | Ref.   |           | 86                      | Ref.   |           | 20                | Ref.     |           | 18               | Ref.     |           |
|       | Q2       | ≥190-218       | 47                        | 1.39   | 0.85-2.29 | 63                      | 0.99   | 0.70-1.41 | 17                | 1.02     | 0.44-2.33 | 11               | 0.93     | 0.33-2.57 |
|       | Q3       | ≥218-248       | 48                        | 1.16   | 0.70-1.95 | 71                      | 1.24   | 0.87-1.78 | 15                | 1.02     | 0.42-2.46 | 3                | 0.22     | 0.04-1.23 |
|       | Q4       | ≥248           | 58                        | 1.15   | 0.68-1.93 | 61                      | 1.25   | 0.86-1.82 |                   |          |           |                  |          |           |
|       | P-trend  |                |                           | 180    |           | 0.97                    | 281    |           | 0.15              | 52       |           | 0.97             | 32       |           |
| HDL-C | Q1       | <45            | 16                        | Ref.   |           | 91                      | Ref.   |           | 12                | Ref.     |           | 21               | Ref.     |           |
|       | Q2       | ≥45-54         | 41                        | 1.18   | 0.66-2.12 | 67                      | 0.98   | 0.71-1.35 | 12                | 0.78     | 0.25-2.42 | 10               | 0.85     | 0.33-2.15 |
|       | Q3       | ≥54-65         | 56                        | 1.10   | 0.62-1.94 | 53                      | 1.08   | 0.76-1.54 |                   |          |           |                  |          |           |
|       | Q4       | ≥65            | 51                        | 0.71   | 0.40-1.29 | 37                      | 1.44   | 0.96-2.16 | 28                | 0.61     | 0.23-1.64 | 1                | -        | -         |
|       | P-trend  |                |                           | 164    |           | 0.03                    | 248    |           | 0.11              | 52       |           | 0.31             | 32       |           |
| LDL-C | Q1       | <114           | 32                        | Ref.   |           | 82                      | Ref.   |           | 22                | Ref.     |           | 15               | Ref.     |           |
|       | Q2       | ≥114-136       | 40                        | 1.17   | 0.72-1.90 | 66                      | 1.00   | 0.70-1.42 | 10                | 0.97     | 0.37-2.58 | 8                | 0.86     | 0.27-2.71 |
|       | Q3       | ≥136-159       | 50                        | 1.24   | 0.76-2.03 | 70                      | 1.09   | 0.75-1.56 |                   |          |           |                  |          |           |
|       | Q4       | ≥159           | 58                        | 1.33   | 0.81-2.18 | 62                      | 1.03   | 0.70-1.51 | 20                | 1.09     | 0.47-2.51 | 9                | 0.45     | 0.13-1.59 |
|       | P-trend  |                |                           | 180    |           | 0.27                    | 280    |           | 0.81              | 52       |           | 0.85             | 32       |           |
| TG    | Q1       | <92            | 42                        | Ref.   |           | 54                      | Ref.   |           | 27                | Ref.     |           | 13               | Ref.     |           |
|       | Q2       | ≥92-131        | 51                        | 1.05   | 0.69-1.60 | 72                      | 1.08   | 0.76-1.55 | 10                | 0.61     | 0.22-1.68 | 7                | 1.39     | 0.39-4.99 |
|       | Q3       | ≥131-190       | 52                        | 1.28   | 0.84-1.96 | 63                      | 0.79   | 0.54-1.15 |                   |          |           |                  |          |           |
|       | Q4       | ≥190           | 35                        | 1.15   | 0.72-1.86 | 92                      | 0.99   | 0.70-1.42 | 15                | 1.58     | 0.66-3.82 | 12               | 1.58     | 0.45-5.51 |
|       | P-trend  |                |                           | 180    |           | 0.46                    | 281    |           | 0.85              | 52       |           | 0.37             | 32       |           |

\*Quartiles for each cholesterol measure were computed using the distribution of values among participants in the UK Biobank.

^Cases may not sum to total due to missing cholesterol values.

†Adjusted for age, race (White vs. non-White), education (secondary school vs. vocational training vs. some college vs. completed college vs. none of the above), history of diabetes (yes vs. no), history of hypertension (yes vs. no), BMI (≤25 kg/m<sup>2</sup> vs. 25-30 kg/m<sup>2</sup> vs. ≥30 kg/m<sup>2</sup>), smoking status (never vs. past vs. current), and statin use (current use vs. no current use).

‡Adjusted for hypertension (yes vs. no), diabetes (yes vs. no), BMI (continuous), and smoking status (never vs. past vs. current).

\*\*Matched on age, cohort, fasting status, month of sample collection, and ethnic background.

%Adjusted for history of hypertension (yes vs. no), history of diabetes (yes vs. no), statin use (current use vs. no current use), BMI (continuous), and smoking status (never vs. past vs. current).

Abbreviations: BMI: body mass index, CI: confidence interval, HDL-C: high-density lipoprotein cholesterol, HR: hazard ratio, LDL-C: low-density lipoprotein cholesterol, MV: multivariable, OR: odds ratio, TC: total cholesterol, TG: triglycerides

**Supplementary Table 3.** Risk of glioma subtypes in the UK Biobank by baseline cholesterol, age and multivariable adjusted.

|       | Quartile | Range (mg/dL)* | Cases <sup>^</sup> | HR <sup>†</sup> | 95%CI     | MV HR <sup>‡</sup> | 95%CI          | Cases <sup>^</sup> | HR <sup>†</sup> | 95%CI     | MV HR <sup>‡</sup> | 95%CI     |  |
|-------|----------|----------------|--------------------|-----------------|-----------|--------------------|----------------|--------------------|-----------------|-----------|--------------------|-----------|--|
|       |          | <b>GBM</b>     |                    |                 |           |                    | <b>Non-GBM</b> |                    |                 |           |                    |           |  |
| TC    | Q1       | <190           | 86                 | Ref.            |           | Ref.               |                | 27                 | Ref.            |           | Ref.               |           |  |
|       | Q2       | ≥190-218       | 83                 | 1.23            | 0.90-1.67 | 1.14               | 0.82-1.58      | 27                 | 1.06            | 0.62-1.82 | 1.09               | 0.62-1.92 |  |
|       | Q3       | ≥218-248       | 77                 | 1.13            | 0.83-1.55 | 1.06               | 0.75-1.49      | 42                 | 1.62            | 1.00-2.64 | 1.67               | 0.97-2.87 |  |
|       | Q4       | ≥248           | 96                 | 1.40            | 1.04-1.90 | 1.31               | 0.93-1.84      | 23                 | 0.87            | 0.49-1.53 | 0.89               | 0.48-1.67 |  |
|       | P-trend  |                | 342                |                 | 0.04      |                    | 0.15           | 119                |                 | 0.99      |                    | 0.95      |  |
| HDL-C | Q1       | <45            | 85                 | Ref.            |           | Ref.               |                | 22                 | Ref.            |           | Ref.               |           |  |
|       | Q2       | ≥45-54         | 80                 | 1.05            | 0.77-1.42 | 0.98               | 0.72-1.35      | 28                 | 1.37            | 0.78-2.41 | 1.28               | 0.72-2.26 |  |
|       | Q3       | ≥54-65         | 73                 | 1.02            | 0.74-1.41 | 0.97               | 0.70-1.36      | 36                 | 1.89            | 1.09-3.27 | 1.66               | 0.94-2.94 |  |
|       | Q4       | ≥65            | 67                 | 1.07            | 0.76-1.52 | 0.99               | 0.68-1.44      | 21                 | 1.18            | 0.62-2.23 | 0.98               | 0.50-1.92 |  |
|       | P-trend  |                | 305                |                 | 0.74      |                    | 0.96           | 107                |                 | 0.52      |                    | 0.98      |  |
| LDL-C | Q1       | <114           | 89                 | Ref.            |           | Ref.               |                | 25                 | Ref.            |           | Ref.               |           |  |
|       | Q2       | ≥114-136       | 71                 | 0.99            | 0.72-1.36 | 0.91               | 0.65-1.27      | 35                 | 1.47            | 0.88-2.46 | 1.54               | 0.89-2.66 |  |
|       | Q3       | ≥136-159       | 96                 | 1.27            | 0.95-1.70 | 1.16               | 0.84-1.62      | 24                 | 0.98            | 0.56-1.72 | 1.04               | 0.56-1.93 |  |
|       | Q4       | ≥159           | 86                 | 1.15            | 0.85-1.56 | 1.05               | 0.75-1.49      | 34                 | 1.36            | 0.81-2.28 | 1.46               | 0.81-2.63 |  |
|       | P-trend  |                | 342                |                 | 0.20      |                    | 0.51           | 118                |                 | 0.49      |                    | 0.42      |  |
| TG    | Q1       | <92            | 66                 | Ref.            |           | Ref.               |                | 30                 | Ref.            |           | Ref.               |           |  |
|       | Q2       | ≥92-131        | 90                 | 1.14            | 0.83-1.57 | 1.11               | 0.80-1.54      | 33                 | 0.98            | 0.60-1.62 | 1.00               | 0.60-1.65 |  |
|       | Q3       | ≥131-190       | 88                 | 1.05            | 0.76-1.45 | 1.06               | 0.76-1.47      | 27                 | 0.76            | 0.45-1.29 | 0.78               | 0.46-1.34 |  |
|       | Q4       | ≥190           | 98                 | 1.15            | 0.84-1.58 | 1.16               | 0.84-1.62      | 29                 | 0.80            | 0.48-1.34 | 0.84               | 0.49-1.46 |  |
|       | P-trend  |                | 342                |                 | 0.54      |                    | 0.44           | 119                |                 | 0.32      |                    | 0.47      |  |

\*Quartiles for each cholesterol measure were computed using the distribution of values among participants in the UK Biobank.

<sup>^</sup>Cases may not sum to total due to missing cholesterol values.

<sup>†</sup>Adjusted for age and sex (male vs. female)

<sup>‡</sup>Additionally adjusted for race (White vs. non-White vs. missing), education (secondary school vs. vocational training vs. some college vs. completed college vs. none of the above vs. missing), diabetes (yes vs. no vs. missing), hypertension (yes vs. no vs. missing), BMI (≤25 kg/m<sup>2</sup> vs. 25-30 kg/m<sup>2</sup> vs. ≥30 kg/m<sup>2</sup> vs. missing), smoking status (never vs. past vs. current vs. missing), and statin use (yes vs. no vs. missing).

Abbreviations: BMI: body mass index, CI: confidence interval, GBM: glioblastoma, HDL-C: high-density lipoprotein cholesterol, HR: hazard ratio, LDL-C: low-density lipoprotein cholesterol, MV: multivariable, TC: total cholesterol, TG: triglycerides

**Supplementary Table 4.** Risk of glioma in the UK Biobank by baseline cholesterol, age and multivariable adjusted, restricted to non-users of statins at baseline.

|       | Quartile | Range (mg/dL)* | Cases <sup>^</sup> | HR <sup>†</sup> | 95%CI     | MV HR <sup>‡</sup> | 95%CI     |
|-------|----------|----------------|--------------------|-----------------|-----------|--------------------|-----------|
| TC    | Q1       | <190           | 59                 | Ref.            |           | Ref.               |           |
|       | Q2       | ≥190-218       | 85                 | 0.99            | 0.71-1.39 | 0.99               | 0.71-1.39 |
|       | Q3       | ≥218-248       | 114                | 1.16            | 0.84-1.59 | 1.16               | 0.84-1.60 |
|       | Q4       | ≥248           | 113                | 1.09            | 0.79-1.50 | 1.09               | 0.78-1.51 |
|       | P-trend  |                | 371                |                 | 0.48      |                    | 0.47      |
| HDL-C | Q1       | <45            | 79                 | Ref.            |           | Ref.               |           |
|       | Q2       | ≥45-54         | 86                 | 1.02            | 0.76-1.40 | 1.00               | 0.73-1.36 |
|       | Q3       | ≥54-65         | 97                 | 1.20            | 0.88-1.63 | 1.13               | 0.83-1.56 |
|       | Q4       | ≥65            | 70                 | 0.87            | 0.62-1.24 | 0.80               | 0.56-1.16 |
|       | P-trend  |                | 332                |                 | 0.55      |                    | 0.30      |
| LDL-C | Q1       | <114           | 58                 | Ref.            |           | Ref.               |           |
|       | Q2       | ≥114-136       | 81                 | 0.92            | 0.66-1.30 | 0.93               | 0.66-1.30 |
|       | Q3       | ≥136-159       | 114                | 1.05            | 0.76-1.44 | 1.06               | 0.76-1.46 |
|       | Q4       | ≥159           | 117                | 1.06            | 0.77-1.46 | 1.07               | 0.78-1.48 |
|       | P-trend  |                | 370                |                 | 0.49      |                    | 0.44      |
| TG    | Q1       | <92            | 79                 | Ref.            |           | Ref.               |           |
|       | Q2       | ≥92-131        | 104                | 1.06            | 0.79-1.44 | 1.08               | 0.80-1.45 |
|       | Q3       | ≥131-190       | 95                 | 0.99            | 0.73-1.34 | 1.01               | 0.74-1.37 |
|       | Q4       | ≥190           | 93                 | 0.95            | 0.70-1.28 | 0.98               | 0.71-1.34 |
|       | P-trend  |                | 371                |                 | 0.54      |                    | 0.70      |

\*Quartiles for each cholesterol measure were computed using the distribution of values among participants in the UK Biobank.

<sup>^</sup>Cases may not sum to total due to missing cholesterol values.

<sup>†</sup>Adjusted for age and sex (male vs. female)

<sup>‡</sup>Additionally adjusted for race (White vs. non-White vs. missing), education (secondary school vs. vocational training vs. some college vs. completed college vs. none of the above vs. missing), diabetes (yes vs. no vs. missing), hypertension (yes vs. no vs. missing), BMI ( $\leq 25$  kg/m<sup>2</sup> vs. 25-30 kg/m<sup>2</sup> vs.  $\geq 30$  kg/m<sup>2</sup> vs. missing), and smoking status (never vs. past vs. current vs. missing).

Abbreviations: BMI: body mass index, CI, confidence interval, HDL-C: high-density lipoprotein cholesterol, HR: hazard ratio, LDL-C: low-density lipoprotein cholesterol, MV: multivariable, TC: total cholesterol, TG: triglycerides

**Supplementary Table 5.** Risk of glioma subtypes in the UK Biobank by baseline cholesterol concentrations with a four year lag period.

|       | Quartile | Range (mg/dL)* | Total  |        |           | GBM    |        |           | LGG    |        |           |
|-------|----------|----------------|--------|--------|-----------|--------|--------|-----------|--------|--------|-----------|
|       |          |                | Cases^ | MV HR† | 95%CI     | Cases^ | MV HR† | 95%CI     | Cases^ | MV HR‡ | 95%CI     |
| TC    | Q1       | <190           | 49     | Ref.   |           | 35     | Ref.   |           | 14     | Ref.   |           |
|       | Q2       | ≥190-218       | 53     | 1.39   | 0.91-2.12 | 41     | 1.58   | 0.96-2.61 | 12     | 0.96   | 0.43-2.17 |
|       | Q3       | ≥218-248       | 56     | 1.49   | 0.96-2.31 | 37     | 1.47   | 0.86-2.50 | 19     | 1.50   | 0.69-3.29 |
|       | Q4       | ≥248           | 71     | 1.86   | 1.21-2.88 | 56     | 2.20   | 1.32-3.66 | 15     | 1.14   | 0.49-2.65 |
|       | P-trend  |                | 229    |        | 0.005     |        |        | 0.004     |        |        | 0.60      |
| HDL-C | Q1       | <45            | 45     | Ref.   |           | 34     | Ref.   |           | 11     | Ref.   |           |
|       | Q2       | ≥45-54         | 54     | 1.27   | 0.85-1.92 | 42     | 1.36   | 0.85-2.17 | 12     | 1.06   | 0.46-2.43 |
|       | Q3       | ≥54-65         | 56     | 1.46   | 0.96-2.21 | 38     | 1.40   | 0.86-2.28 | 18     | 1.57   | 0.70-3.50 |
|       | Q4       | ≥65            | 49     | 1.49   | 0.93-2.37 | 35     | 1.64   | 0.95-2.83 | 14     | 1.18   | 0.48-2.91 |
|       | P-trend  |                | 204    |        | 0.09      |        |        | 0.09      |        |        | 0.64      |
| LDL-C | Q1       | <114           | 56     | Ref.   |           | 41     | Ref.   |           | 15     | Ref.   |           |
|       | Q2       | ≥114-136       | 44     | 0.94   | 0.61-1.45 | 28     | 0.84   | 0.50-1.43 | 16     | 1.15   | 0.54-2.44 |
|       | Q3       | ≥136-159       | 62     | 1.23   | 0.81-1.87 | 51     | 1.43   | 0.88-2.32 | 11     | 0.77   | 0.33-1.81 |
|       | Q4       | ≥159           | 66     | 1.33   | 0.87-2.04 | 49     | 1.40   | 0.85-2.31 | 17     | 1.15   | 0.51-2.56 |
|       | P-trend  |                | 228    |        | 0.10      |        |        | 0.07      |        |        | 0.88      |
| TG    | Q1       | <92            | 53     | Ref.   |           | 36     | Ref.   |           | 17     | Ref.   |           |
|       | Q2       | ≥92-131        | 66     | 0.98   | 0.67-1.42 | 49     | 1.03   | 0.66-1.61 | 17     | 0.87   | 0.44-1.72 |
|       | Q3       | ≥131-190       | 48     | 0.69   | 0.46-1.04 | 37     | 0.77   | 0.48-1.24 | 11     | 0.54   | 0.25-1.17 |
|       | Q4       | ≥190           | 62     | 0.88   | 0.60-1.31 | 47     | 0.95   | 0.60-1.50 | 15     | 0.75   | 0.35-1.57 |
|       | P-trend  |                | 229    |        | 0.48      |        |        | 0.72      |        |        | 0.42      |

\*Quartiles for each cholesterol measure were computed using the distribution of values among participants in the UK Biobank.

^Cases may not sum to total due to missing cholesterol values.

†Adjusted for age, sex (male vs. female), race (White vs. non-White), education (secondary school vs. vocational training vs. some college vs. completed college vs. none of the above), history of hypertension (yes vs. no), history of diabetes (yes vs. no), BMI (≤25 kg/m<sup>2</sup> vs. 25-30 kg/m<sup>2</sup> vs. ≥30 kg/m<sup>2</sup>), smoking status (never vs. past vs. current), and statin use (current use vs. no current use).

‡Adjusted for age, sex (male vs. female), race (White vs. non-White), education (secondary school vs. vocational training vs. some college vs. completed college vs. none of the above), history of hypertension (yes vs. no), history of diabetes (yes vs. no), BMI (≤25 kg/m<sup>2</sup> vs. 25-30 kg/m<sup>2</sup> vs. ≥30 kg/m<sup>2</sup>), and smoking status (never vs. past vs. current).

Abbreviations: BMI: body mass index, CI: confidence interval, HDL-C: high-density lipoprotein cholesterol, HR: hazard ratio, LDL-C: low-density lipoprotein cholesterol, MV: multivariable, TC: total cholesterol, TG: triglycerides

**Supplementary Table 6.** Risk of glioma in the UK Biobank by baseline statin use, age and multivariable adjusted.

|                               | <b>Category</b> | <b>Cases*</b> | <b>HR<sup>^</sup></b> | <b>95%CI</b> | <b>MV HR<sup>†</sup></b> | <b>95%CI</b> |
|-------------------------------|-----------------|---------------|-----------------------|--------------|--------------------------|--------------|
| <b>Total</b>                  |                 |               |                       |              |                          |              |
| Statin use                    | No current use  | 389           | Ref.                  |              | Ref.                     |              |
|                               | Current use     | 101           | 1.00                  | 0.79-1.25    | 1.04                     | 0.81-1.33    |
| Statin use with four year lag | No current use  | 191           | Ref.                  |              | Ref.                     |              |
|                               | Current use     | 47            | 0.96                  | 0.69-1.33    | 1.05                     | 0.73-1.50    |
| <b>Male</b>                   |                 |               |                       |              |                          |              |
| Statin use                    | No current use  | 229           | Ref.                  |              | Ref.                     |              |
|                               | Current use     | 73            | 0.98                  | 0.75-1.28    | 0.97                     | 0.72-1.31    |
| Statin use with four year lag | No current use  | 112           | Ref.                  |              | Ref.                     |              |
|                               | Current use     | 34            | 0.96                  | 0.64-1.42    | 1.00                     | 0.64-1.54    |
| <b>Female</b>                 |                 |               |                       |              |                          |              |
| Statin use                    | No current use  | 160           | Ref.                  |              | Ref.                     |              |
|                               | Current use     | 28            | 1.04                  | 0.69-1.57    | 1.25                     | 0.80-1.95    |
| Statin use with four year lag | No current use  | 79            | Ref.                  |              | Ref.                     |              |
|                               | Current use     | 13            | 0.97                  | 0.53-1.76    | 1.20                     | 0.63-2.29    |
| <b>GBM</b>                    |                 |               |                       |              |                          |              |
| Statin use                    | No current use  | 289           | Ref.                  |              | Ref.                     |              |
|                               | Current use     | 77            | 1.01                  | 0.78-1.31    | 1.03                     | 0.77-1.38    |
| Statin use with four year lag | No current use  | 143           | Ref.                  |              | Ref.                     |              |
|                               | Current use     | 35            | 1.00                  | 0.68-1.47    | 1.16                     | 0.73-1.83    |
| <b>Non-GBM</b>                |                 |               |                       |              |                          |              |
| Statin use                    | No current use  | 100           | Ref.                  |              | Ref.                     |              |
|                               | Current use     | 24            | 1.01                  | 0.64-1.59    | 0.83                     | 0.49-1.41    |
| Statin use with four year lag | No current use  | 48            | Ref.                  |              | Ref.                     |              |
|                               | Current use     | 12            | 1.02                  | 0.53-1.94    | 1.02                     | 0.46-2.27    |

\*Cases may not sum to total due to missing statin use values.

<sup>^</sup>Adjusted for age and sex (male vs. female)

<sup>†</sup>Additionally adjusted for race (White vs. non-White), education (secondary school vs. vocational training vs. some college vs. completed college vs. none of the above), diabetes (yes vs. no), hypertension (yes vs. no), BMI ( $\leq 25$  kg/m<sup>2</sup> vs. 25-30 kg/m<sup>2</sup> vs.  $\geq 30$  kg/m<sup>2</sup>), and smoking status (never vs. past vs. current).

Abbreviations: BMI: body mass index, CI, confidence interval, GBM: glioblastoma, HR: hazard ratio, MV: multivariable
